# Supplementary material for: Solid-state NMR analysis of unlabeled fungal cell walls from Aspergillus and Candida species
Source: PubMed Central journal article supplement (PMC9310124; doi:10.1016/j.yjsbx.2022.100070), 2022-07-19
Supplement: mmc1.pdf [file mmc1.pdf]

# Supplementary Information

## Solid-State NMR Analysis of Unlabeled Fungal Cell Walls from *Aspergillus* and *Candida* Species

Liyanage D Fernando<sup>1#</sup>, Malitha C. Dickwella Widanage<sup>1#</sup>, S Chandra Shekar<sup>1</sup>, Frederic Mentink-Vigier<sup>2</sup>, Ping Wang<sup>3</sup>, Sungsool Wi<sup>2</sup>, and Tuo Wang<sup>1\*</sup>

<sup>1</sup> Department of Chemistry, Louisiana State University, Baton Rouge, LA 70803, USA

<sup>2</sup> National High Magnetic Field Laboratory, Tallahassee, FL 32310, USA

<sup>3</sup> Department of Microbiology, Immunology, and Parasitology, Louisiana State University Health Sciences Center, New Orleans, LA 70112, USA

# These authors contributed equally

\*Correspondence: Tuo Wang (tuowang@lsu.edu)

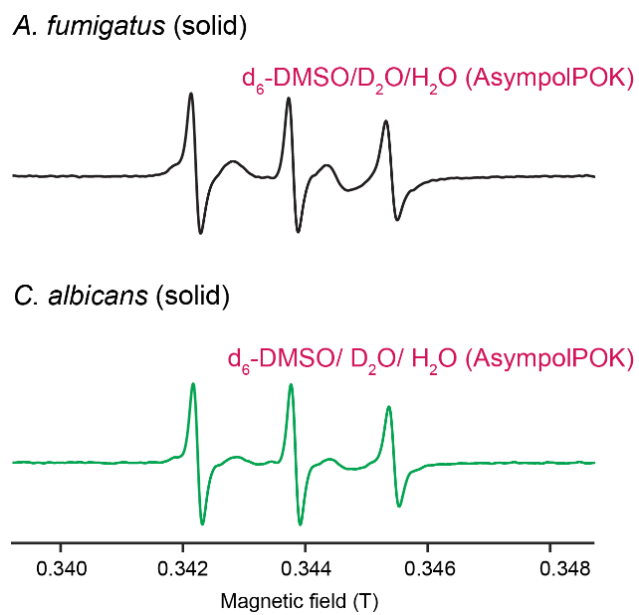

**Supplementary Figure 1.** Room-temperature EPR spectra of AsympolPOK at 9.6 GHz.

**Table S1. Experimental parameters used for MAS-DNP and ssNMR on intact fungal cells.** Abbreviations are used for  $^1\text{H}$  Larmor frequency ( $\omega_{0, 1\text{H}}$ ), total experimental time (t), recycle delay (d1), number of scans (NS), number of points in F2 (td2), number of increments in F1 (td1), acquisition time during t2 for F2 (aq2), and indirect acquisition time for F1 (aq1). Not applicable (-). Experiments were collected on either a 600 MHz/395 GHz MAS-DNP, an 800 MHz ssNMR, or a 400 MHz ssNMR.

| Sample                          | Experiment                                | $\omega_{0, 1\text{H}}$<br>(MHz) | t (hr) | MAS<br>(kHz) | NS     | d1 (s) | td2  | td1     | aq2<br>(ms) | aq1<br>(ms) |
|---------------------------------|-------------------------------------------|----------------------------------|--------|--------------|--------|--------|------|---------|-------------|-------------|
| <i>C. albicans</i><br>(solid)   | 1D $^1\text{H}$ (MW on/off)               | 600                              | 2.2    | 8            | 2      | 1.0    | -    | 4096    | -           | 5.7         |
|                                 | 1D $^{13}\text{C}$ (MW on/off)            |                                  | 63.7   | 64           | 3.5    | -      | 1024 | -       | 5.7         |             |
|                                 | 1D CP                                     |                                  | 254    | 10.5         | 256    | 3.5    | -    | 1024    | -           | 5.7         |
|                                 | CP refocused dipolar<br>(SPC5) INADEQUATE |                                  | 20     | 256          | 3.5    | 2048   | 80   | 17.2    | 1.2         |             |
| <i>C. albicans</i><br>(liquid)  | 1D $^1\text{H}$ (MW on/off)               | 600                              | 2.2    | 8            | 2      | 1.0    | -    | 4096    | -           | 5.7         |
|                                 | 1D $^{13}\text{C}$ (MW on/off)            |                                  | 72.8   | 64           | 4.0    | -      | 1024 | -       | 5.7         |             |
|                                 | CP refocused dipolar<br>(SPC5) INADEQUATE |                                  | 5.6    | 10.5         | 256    | 4.0    | 2048 | 80      | 17.2        | 1.2         |
|                                 | DP refocused J-<br>INADEQUATE             | 800                              | 0.4    | 13.5         | 8      | 1.5    | 2600 | 120     | 19.4        | 1.2         |
|                                 | CP refocused dipolar<br>(SPC5) INADEQUATE | 400                              | 5.2    | 7.5          | 112    | 1.7    | 1800 | 100     | 18.0        | 6.2         |
| <i>A. fumigatus</i><br>(solid)  | 1D $^1\text{H}$ (MW on/off)               | 600                              | 2.2    | 8            | 2      | 1.0    | -    | 4096    | -           | 5.7         |
|                                 | 1D $^{13}\text{C}$ (MW on/off)            |                                  | 27.3   | 10.5         | 64     | 1.5    | -    | 1024    | -           | 5.7         |
|                                 | $^{13}\text{C}-T_1$                       | 400                              | 120    | 14           | 10-40k | 2.0    | -    | 1800    | -           | 18.0        |
|                                 | CP refocused dipolar<br>(SPC5) INADEQUATE | 600                              | 18.4   | 10.5         | 1024   | 1.3    | 2048 | 50      | 17.2        | 0.8         |
|                                 | DQF-DARR                                  | 600                              | 30     | 10.5         | 32/64  | 5.0    | 2048 | 200-300 | 17.2        | 0.3         |
| <i>A. fumigatus</i><br>(liquid) | CP J-INADEQUATE                           | 800                              | 9      | 13.5         | 16     | 2.0    | 2400 | 1024    | 17.9        | 10.2        |
|                                 | $^{13}\text{C}-T_1$                       | 400                              | 120    | 14           | 24-40k | 2.0    | -    | 1800    | -           | 18.0        |

**Table S2. Parameters used for the fit of  $^{13}\text{C}$  MultiCP spectra in Figure 6A.** unk: unknown or unresolved peaks. The error was estimated using the Monte Carlo error estimation of Dmfit.

| $\Delta$ (ppm)                    | assignment                       | amplitude | width (ppm) | integral (%) |
|-----------------------------------|----------------------------------|-----------|-------------|--------------|
| <i>C. albicans</i> liquid culture |                                  |           |             |              |
| 103.1                             | B1                               | 7511      | 1.22±0.03   | 5.7±0.2      |
| 85.9                              | B3                               | 8000      | 1.05±0.03   | 2.26±0.07    |
| 78.1                              | B5                               | 8196      | 1.4±0.1     | 1.2±0.2      |
| 74.4                              | B2                               | 8305      | 0.83±0.01   | 20.1±0.3     |
| 68.6                              | B4                               | 8466      | 0.56±0.02   | 18±2         |
| 103.4                             | Ch1                              | 7482      | 1.43±0.03   | 3.9±0.2      |
| 82.9                              | Ch3                              | 8115      | 0.88±0.07   | 2.1±0.2      |
| 54.3                              | Ch2                              | 8861      | 1.54±0.07   | 0.54±0.06    |
| 101.8                             | Mn <sup>1,2</sup> 1 <sup>a</sup> | 7564      | 0.83±0.02   | 4.9±0.2      |
| 79.6                              | Mn <sup>1,2</sup> 2 <sup>a</sup> | 8161      | 1.11±0.09   | 1.5±0.2      |
| 70.5                              | Mn <sup>1,2</sup> 3 <sup>a</sup> | 84116     | 0.66±0.03   | 13±2         |
| 98.0                              | Mn <sup>1,2</sup> 1 <sup>b</sup> | 7651      | 1.05±0.07   | 1.33±0.09    |
| 72.1                              | Mn <sup>1,6</sup>                | 8365      | 0.73±0.03   | 9±2          |
| 62.3                              | unk                              | 8642      | 0.82±0.02   | 10.9±0.2     |
| 59.26                             | unk                              | 8725      | 0.80±0.02   | 5.0±0.2      |
| <i>C. albicans</i> solid culture  |                                  |           |             |              |
| 103.1                             | B1                               | 7478      | 0.9±0.4     | 4.3±0.5      |
| 85.9                              | B3                               | 8002      | 0.63±0.03   | 2.3±0.1      |
| 78.1                              | B5                               | 8188      | 0.64±0.06   | 2.1±0.5      |
| 74.4                              | B2                               | 8305      | 0.53±0.01   | 21.1±0.5     |
| 68.6                              | B4                               | 8509      | 0.62±0.09   | 4±1          |
| 103.4                             | Ch1                              | 7514      | 0.95±0.03   | 4.3±0.4      |
| 82.9                              | Ch3                              | 8130      | 0.55±0.04   | 3.4±0.5      |
| 54.3                              | Ch2                              | 8775      | 0.11±0.01   | 2.5±0.1      |
| 101.8                             | Mn <sup>1,2</sup> 1 <sup>a</sup> | 7570      | 0.74±0.03   | 3.4±0.2      |
| 69                                | Mn <sup>1,2</sup> 2 <sup>a</sup> | 8453      | 0.51±0.03   | 12±1         |
| 70.5                              | Mn <sup>1,2</sup> 3 <sup>a</sup> | 8397      | 0.44±0.02   | 17±2         |
| 98.0                              | Mn <sup>1,2</sup> 1 <sup>b</sup> | 7646      | 0.89±0.08   | 1.1±0.2      |
| 62.3                              | unk                              | 8641      | 0.56±0.08   | 11±4         |
| 59.26                             | unk                              | 8715      | 0.8±0.1     | 1.8±0.5      |

**Table S3. The average cell wall thickness of *A. fumigatus* and *C. albicans*.** Results describe the average of 10 measurements from 15 biological replicates of each solid and liquid cultures.

| Sample         | Cell wall thickness (nm) |                    |
|----------------|--------------------------|--------------------|
|                | <i>A. fumigatus</i>      | <i>C. albicans</i> |
| Solid culture  | 134±21                   | 195±50             |
| Liquid culture | 159±35                   | 182±68             |

**Table S4. DNP buildup time and enhancement factor.** The enhancement factor ( $\epsilon_{\text{on/off}}$ ) is obtained by comparing the intensity of spectra measured with microwave on and off. The concentration of biradicals, the culture condition (solid or liquid media), and the composition of the DNP juice (matrix) are also listed.

| Sample                      | Radical             | Matrix                                                             | DNP build-up time (s) | $\epsilon_{\text{on/off}}$ |
|-----------------------------|---------------------|--------------------------------------------------------------------|-----------------------|----------------------------|
| <i>A. fumigatus</i> (solid) | 20 mM c-AsymPol-POK | d <sub>6</sub> -DMSO-D <sub>2</sub> O-H <sub>2</sub> O (1:8:1)     | 1.3                   | 26                         |
| <i>A. fumigatus</i> (solid) | 10 mM AMUPol,       | d <sub>8</sub> -glycerol/D <sub>2</sub> O/H <sub>2</sub> O (6:3:1) | 5.0                   | 90                         |
| <i>C. albicans</i> (solid)  | 20 mM c-AsymPol-POK | d <sub>6</sub> -DMSO-D <sub>2</sub> O-H <sub>2</sub> O (1:8:1)     | 2.6                   | 30                         |
| <i>C. albicans</i> (liquid) |                     |                                                                    | 3.1                   | 26                         |

**Table S5. <sup>13</sup>C chemical shifts of polysaccharides and proteins in fungal cell walls.** The units are in ppm. (/) unidentified. (-) not applicable.

| Carbohydrate               | Chemical shifts (ppm) |           |           |      |      |      |           |                 | References                           |
|----------------------------|-----------------------|-----------|-----------|------|------|------|-----------|-----------------|--------------------------------------|
|                            | C1                    | C2        | C3        | C4   | C5   | C6   | CO        | CH <sub>3</sub> |                                      |
| β-1,3-glucan               | 103.6                 | 74.2      | 87.5      | 68.3 | 77.2 | 61.5 | -         | -               | Chakraborty et al. 2021 <sup>1</sup> |
| α-1,3-glucan               | 101                   | 71.9      | 84.5      | 69.5 | 71.7 | 60.5 | -         | -               | Chakraborty et al. 2021 <sup>1</sup> |
| β-1,6-glucan               | 103.9                 | 74.6      | 76.6      | 70.6 | 75.7 | 69.6 | -         | -               | Lowman et al. 2011 <sup>2</sup>      |
| Chitin                     | 103.3                 | 55.5      | 72.9      | 83.0 | 75.7 | 60.9 | 174.8     | 22.6            | Chakraborty et al. <sup>1</sup>      |
| α-1,2-Mannose <sup>a</sup> | 101.4                 | 79.2      | 71.0      | 67.8 | 74.1 | 61.9 | -         | -               |                                      |
| α-1,2-Mannose <sup>b</sup> | 99.1                  | 79.5      | 71.4      | 67.8 | 74.1 | 61.9 | -         | -               |                                      |
| α-1,6-Mannose              | 102.9                 | 71.1      | /         | /    | 72.0 | 66.6 | -         | -               |                                      |
| <b>Amino Acids</b>         | <b>Cα</b>             | <b>Cβ</b> | <b>Cγ</b> |      |      |      | <b>CO</b> |                 |                                      |
| Alanine                    | 52.4                  | 16.3      |           |      |      |      | 177.0     |                 | Fritzsching et al. 2013 <sup>3</sup> |
| Aspartic acid              | 54.8                  | 38.3      | /         |      |      |      | 175.9     |                 |                                      |
| Glutamic acid              | 54.6                  | 28.1      | 34.1      |      |      |      | 174.0     |                 |                                      |
| Phenyl alanine             | 55.5                  | 37.7      | /         |      |      |      | 172.8     |                 |                                      |
| Iso leucine                | 58.7                  | 36.6      | 25.1      | /    | /    |      | 173.5     |                 |                                      |
| Lysine                     | 54.2                  | 30.8      | 22.8      |      | /    | /    | 175.0     |                 |                                      |
| Leucine                    | 52.7                  | 40.3      | 24.8      |      | /    | /    | 174.4     |                 |                                      |
| Methionine                 | 53.2                  | 31.1      | 29.9      |      |      | /    | 173.4     |                 |                                      |
| Asparagine                 | 51.1                  | 36.6      | /         |      |      |      | 172.6     |                 |                                      |
| Proline                    | 61.1                  | 30.0      | 25.2      |      |      |      | 174.2     |                 |                                      |
| Glutamine                  | 53.7                  | 27.4      | 31.7      |      |      |      | 173.4     |                 |                                      |
| Arginine                   | 53.9                  | 28.7      | 25.0      |      |      |      | 173.7     |                 |                                      |
| Threonine                  | 59.5                  | 67.4      | /         |      |      |      | 172.4     |                 |                                      |
| Valine                     | 59.7                  | 30.7      | 19.2      | /    |      |      | 173.4     |                 |                                      |
| Tryptophan                 | 55.0                  | 28.0      | /         | /    | /    | /    | 173.0     |                 |                                      |
| Tyrosine                   | 58.6                  | 36.0      | /         | /    | /    | /    | 173.0     |                 |                                      |

**Table S6.  $^{13}\text{C}$ - $T_1$  relaxation times of polysaccharides.** The data are fit using bi-exponential equations:  $I(t) = e^{\frac{-t}{T_{1b}}}$  and  $I(t) = Ae^{\frac{-t}{T_{1a}}} + (1 - A)e^{\frac{-t}{T_{1b}}}$ , where A is a perfector. Error bars are standard deviations of fit parameters.

| <i>A. fumigatus</i> (liquid culture) |                       |      |                     |      |                   |
|--------------------------------------|-----------------------|------|---------------------|------|-------------------|
| Assignment                           | $^{13}\text{C}$ (ppm) | A    | $T_{1a}$ (s)        | B    | $T_{1b}$ (s)      |
| B3                                   | 86                    | 70 % | $0.6 \pm 0.1$       | 30 % | $5 \pm 3$         |
| B5                                   | 77                    | 40 % | $0.4 \pm 0.1$       | 60 % | $4 \pm 2$         |
| B2                                   | 74                    | 20 % | $0.01 \pm 0.01$     | 80%  | $5 \pm 1$         |
| Ch4                                  | 83                    | 28 % | $0.20 \pm 0.01$     | 72%  | $14 \pm 4$        |
| Ch5                                  | 75                    | 50 % | $0.0045 \pm 0.0001$ | 50 % | $7 \pm 2$         |
| Ch2                                  | 55                    | 43%  | $0.17 \pm 0.06$     | 57 % | $13 \pm 2$        |
| A1                                   | 101                   | 20 % | $0.5 \pm 0.2$       | 80 % | $18 \pm 6$        |
| A3                                   | 84                    | 23 % | $0.8 \pm 0.2$       | 77 % | $23 \pm 10$       |
| A2/5                                 | 71                    | 23 % | $0.0010 \pm 0.0005$ | 77 % | $8 \pm 2$         |
| <i>A. fumigatus</i> (solid culture)  |                       |      |                     |      |                   |
| B3                                   | 86                    | 10 % | $0.20 \pm 0.02$     | 90 % | $5 \pm 1$         |
| B5                                   | 77                    | 50 % | $0.8 \pm 0.3$       | 50%  | $6 \pm 3$         |
| B2                                   | 72                    | 20 % | $0.300 \pm 0.001$   | 80%  | $5.420 \pm 0.006$ |
| B4                                   | 68                    | 20 % | $0.0003 \pm 0.0001$ | 80%  | $3.8 \pm 0.4$     |
| Ch4                                  | 83                    | 11%  | $0.5 \pm 0.4$       | 89%  | $20 \pm 6$        |
| Ch5                                  | 75                    | 11%  | $0.11 \pm 0.05$     | 89%  | $2.8 \pm 0.3$     |
| Ch2                                  | 55                    | 14 % | $0.14 \pm 0.01$     | 86 % | $10.8 \pm 0.3$    |
| A1                                   | 101                   | 30 % | $0.011 \pm 0.002$   | 60 % | $14 \pm 5$        |
| A3                                   | 84                    | 44 % | $0.6 \pm 0.1$       | 56 % | $14 \pm 4$        |
| A2/5                                 | 71                    | 60%  | $0.348 \pm 0.009$   | 40 % | $9.7 \pm 0.6$     |



## Supplementary References

1. Chakraborty, A.; Fernando, L. D.; Fang, W.; Dickwella Widanage, M. C.; Wei, P.; Jin, C.; Fontaine, T.; Latgé, J.-P.; Wang, T., A molecular vision of fungal cell wall organization by functional genomics and solid-state NMR. *Nat. Commun.* **2021**, *12*, 6346.
2. Lowman, D. W.; West, L. J.; Bearden, D. W.; Wempe, M. F.; Power, T. D.; Ensley, H. E.; Haynes, K.; Williams, D. L.; Kruppa, M. D., New insights into the structure of (1→3, 1→6)-β-D-glucan side chains in the *Candida glabrata* cell wall. *PLoS One* **2011**, *6*, e27614.
3. Fritzsche, K.; Yang, Y.; Schmidt-Rohr, K.; Hong, M., Practical use of chemical shift databases for protein solid-state NMR: 2D chemical shift maps and amino-acid assignment with secondary-structure information. *J. Biol. NMR* **2013**, *56*, 155-167.
